# Supplementary material for: Nanoscale mineralization of cell-laden methacrylated gelatin hydrogels using calcium carbonate–calcium citrate core–shell microparticles
Source: Royal Society of Chemistry journal article supplement (doi:10.1039/d1tb01673c), 2021-01-01

## Electronic supplementary material for Journal of Materials Chemistry B

### Nanoscale mineralization of cell-laden methacrylated gelatin hydrogels using calcium carbonate - calcium citrate core-shell microparticles

*Ramesh Subbiah,<sup>a+</sup> Gabriela de Souza Balbinot,<sup>ab+</sup> Avathamsa Athirasala,<sup>c</sup> Fabricio Mezzomo Collares,<sup>b</sup> Grigoriy Sereda,<sup>d\*</sup> Luiz E. Bertassoni<sup>acef\*</sup>*

<sup>a</sup> Division of Biomaterials and Biomechanics, Department of Restorative Dentistry, School of Dentistry, Oregon Health and Science University, Portland, OR 97201, USA.

<sup>b</sup> Department of Dental Materials, School of Dentistry, Universidade Federal do Rio Grande do Sul, Porto Alegre, RS 90035-003, Brazil

<sup>c</sup> Department of Biomedical Engineering, School of Medicine, Oregon Health and Science University, Portland, OR 97201, USA.

<sup>d</sup> Department of Chemistry, University of South Dakota, Vermillion, SD 57069, USA.  
E-mail: [Grigoriy.Sereda@usd.edu](mailto:Grigoriy.Sereda@usd.edu)

<sup>e</sup> Center for Regenerative Medicine, School of Medicine, Oregon Health and Science University, Portland, OR 97201, USA.

<sup>f</sup> Cancer Early Detection Advanced Research Center (CEDAR), Knight Cancer Institute, Oregon Health and Science University, Portland, OR 97201, USA.  
E-mail: [bertasso@ohsu.edu](mailto:bertasso@ohsu.edu)

[<sup>+</sup>]These authors contributed equally to this work.

## 1. Preparation of calcium citrate-calcium carbonate nanoneedles

A solution containing  $\text{CaCl}_2$  (1M) and  $\text{NaOAc}$  (2M), 25 mL was added to 25 mL of 1M  $\text{NaHCO}_3$ , mixed, held for 5 min, and stirred for 4h. A 2 mL sample was taken, centrifuged (1,000 X 5 min), washed with 1X10 mL portion of water (2,000 X 10 min), re-dispersed in 5 mL of water. This yielded intermediate particles of  $\text{CaCO}_3$ .

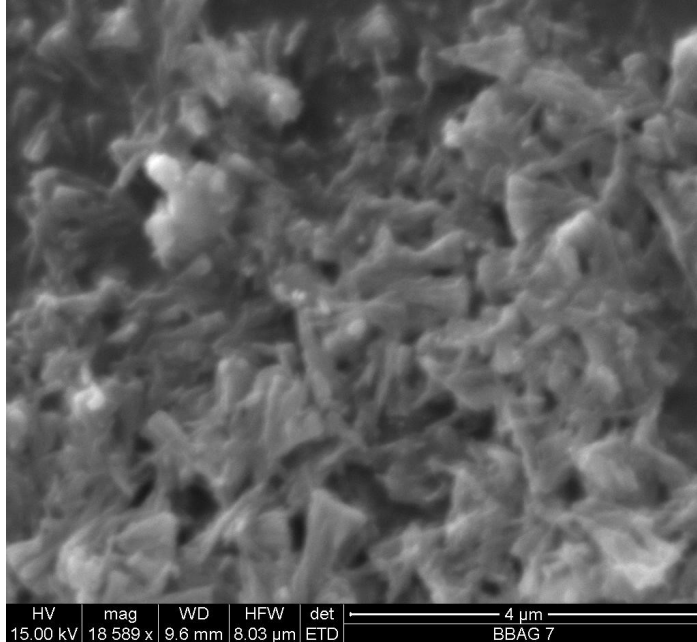

Then the mixture was split into two equal parts.

Part 1 was stirred with 1 mL of 0.02 M of citric acid for 22 h, centrifuged (1,000 X 10 min), washed with 2X20 mL portions of water (1,000 X 5 min), re-dispersed in 10 mL of water. Gravimetric analysis – 53.7 mg/mL. This yielded nanoneedles of  $\text{CaCO}_3$  – calcium citrate from a lower concentration of citric acid.

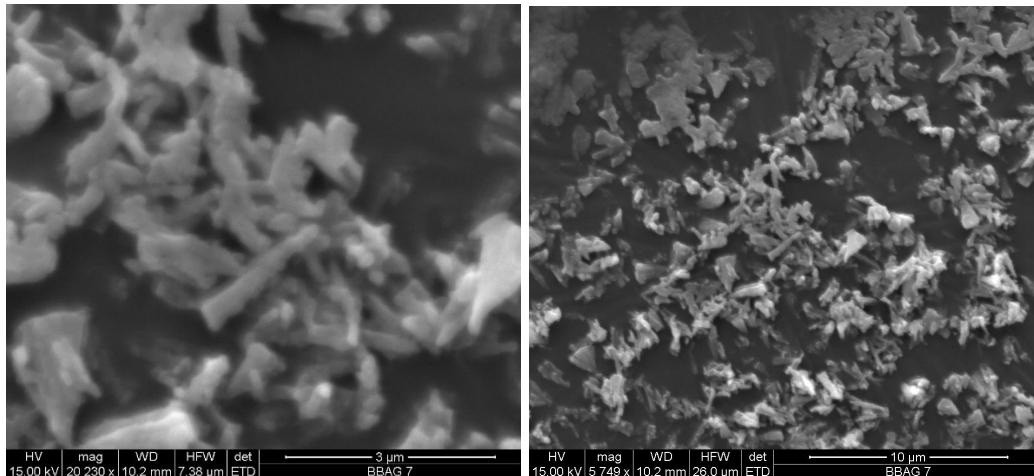

Part 2 was stirred with 1 mL of 0.468 M of citric acid for 22 h, centrifuged (1,000 X 10 min), washed with 2X20 mL portions of water (1,000 X 5 min), re-dispersed in 10 mL of water. Gravimetric analysis – 45 mg/mL. This yielded nanoneedles of  $\text{CaCO}_3$  – calcium citrate from a higher concentration of citric acid.

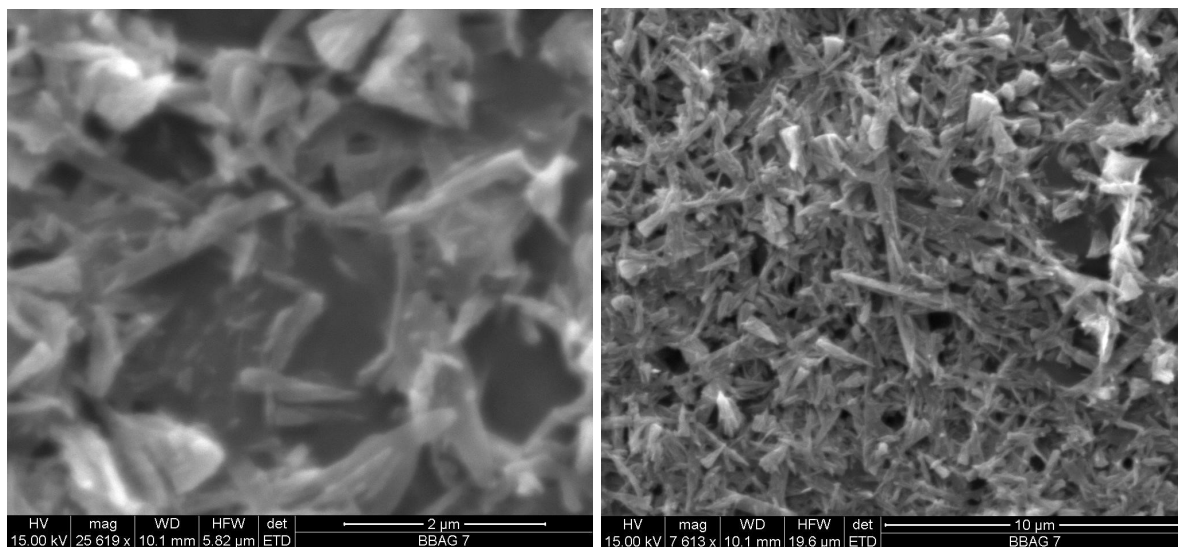

## 2. Preparation of calcium carbonate – calcium citrate nanoclusters

An aqueous  $\text{NaHCO}_3$  (1M, 12.5 mL) was added over 2 min to a vigorously stirred homemade  $\text{CaOAc}_2$  (1M, 12.5 mL). The mixture was kept without stirring for 5 min and then stirred for 1h. Citric acid (1 mL, 0.468M) was added. The mixture was stirred for 18h, centrifuged (1,000 X 10 min), washed with water (2X20 mL, 3,000 X 5min), re-dispersed in 10 mL of water. This yielded calcium carbonate – calcium citrate nanoclusters.

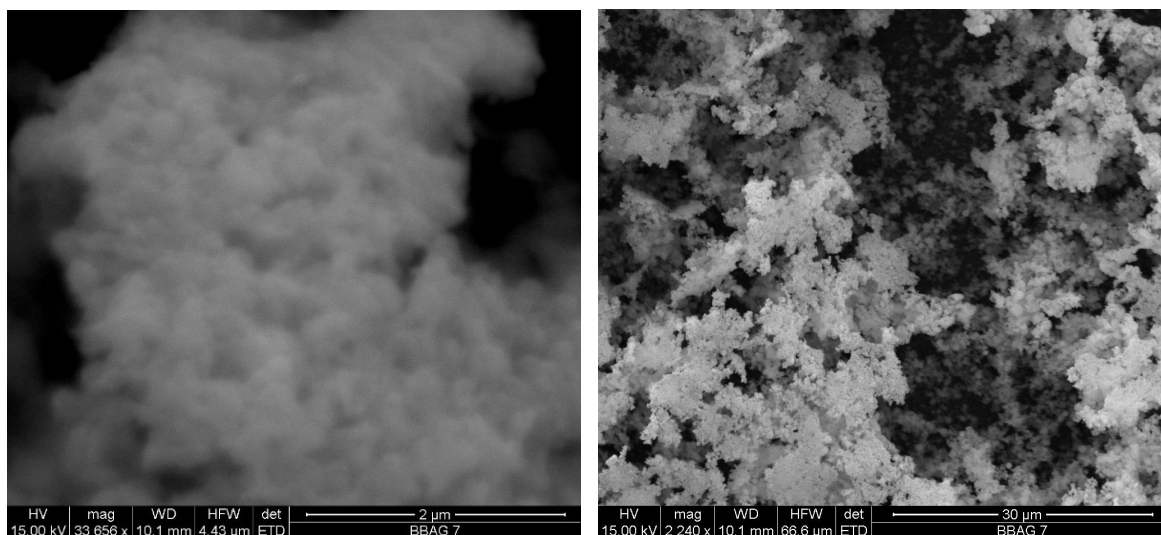

Supplement: d1tb01673c1.pdf [file d1tb01673c1.pdf]
